# Supplementary material for: Cellular Responses to Extracellular Vesicles as Potential Markers of Colorectal Cancer Progression
Source: MDPI journal article supplement (doi:10.3390/ijms242316755), 2023-11-25
Supplement: s1 [file s1]

## Supplementary Materials

Figure S1. SW480 and MRC5 cell migration upon treatment with SW480/SW620 EVs

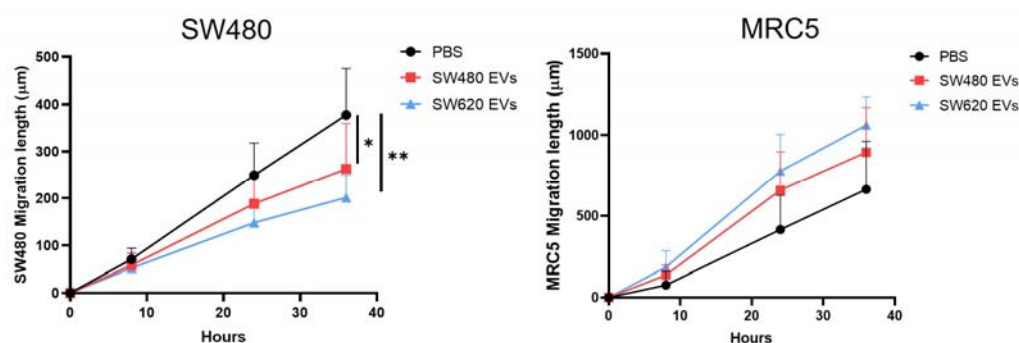

**Figure S1.** Scratch time points for SW480 and MRC5 migration. Scratch assay was performed at 0, 8, 24, 36 hours for SW480 and MRC5 after treatment with SW480 and SW620 EVs. One-way ANOVA with Tukey's post hoc test, \* $p < 0.05$ , \*\* $p < 0.01$ .

Table S1. Cytokine array on SW480 supernatant.

|                     | CTRL    |         | SW620    |          | Fold change |        |
|---------------------|---------|---------|----------|----------|-------------|--------|
|                     | R1      | R2      | R1       | R2       | R1          | R2     |
| Adiposin            | 0.02235 | 0.01255 | 0.029452 | 0.009858 | 1.3177      | 0.7854 |
| BCAM                | 0.0359  | 0.01465 | 0.048402 | 0.015765 | 1.3482      | 1.0760 |
| CD30                | 0.01625 | 0.00818 | 0.025596 | 0.006166 | 1.5751      | 0.7537 |
| CD40                | 0.01105 | 0.00688 | 0.018229 | 0.005707 | 1.6493      | 0.8288 |
| FcγRIIB/C           | 0.0121  | 0.00607 | 0.017958 | 0.006119 | 1.4841      | 1.0072 |
| Ferritin            | 0.06415 | 0.0769  | 0.064236 | 0.051543 | 1.0013      | 0.6702 |
| FLRG                | 0.02005 | 0.01325 | 0.02092  | 0.008877 | 1.0433      | 0.6699 |
| Follistatin         | 0.03315 | 0.0225  | 0.042249 | 0.017082 | 1.2744      | 0.7592 |
| Furin               | 0.02215 | 0.00942 | 0.012626 | 0.009391 | 0.5700      | 0.9963 |
| Galectin-7          | 0.00626 | 0.00367 | 0.00594  | 0.003255 | 0.9480      | 0.8869 |
| GDF-15              | 0.226   | 0.13    | 0.559494 | 0.222234 | 2.475       | 1.7094 |
| Growth Hormone      | 0.0195  | 0.01004 | 0.026826 | 0.010241 | 1.3756      | 1.0194 |
| IL-10 Rα            | 0.0289  | 0.01405 | 0.042332 | 0.014787 | 1.4647      | 1.0524 |
| IL-22               | 0.0187  | 0.00929 | 0.025924 | 0.009688 | 1.3863      | 1.0428 |
| IL-28A              | 0.00946 | 0.00522 | 0.020264 | 0.005099 | 2.1420      | 0.9758 |
| IL-29               | 0.0277  | 0.0133  | 0.049715 | 0.015042 | 1.7947      | 1.1309 |
| IL-31               | 0.01305 | 0.00827 | 0.020756 | 0.007491 | 1.5904      | 0.9058 |
| Insulin             | 0.0086  | 0.00440 | 0.014061 | 0.004967 | 1.635       | 1.1276 |
| Luteinizing Hormone | 0.0194  | 0.01012 | 0.02133  | 0.011261 | 1.0994      | 1.1126 |
| LIMPII              | 0.00671 | 0.00338 | 0.006465 | 0.009255 | 0.9634      | 2.7381 |
| LYVE-1              | 0.0158  | 0.00859 | 0.007786 | 0.00583  | 0.4927      | 0.6786 |
| Maraspin            | 0.0106  | 0.00589 | 0.013077 | 0.004742 | 1.2336      | 0.8050 |
| MICA                | 0.03185 | 0.017   | 0.037983 | 0.018144 | 1.1925      | 1.0673 |

|                   |         |         |          |          |         |        |
|-------------------|---------|---------|----------|----------|---------|--------|
| MICB              | 0       | 0       | 0.000281 | 0        | 0       | 0      |
| MMP-2             | 0.0155  | 0.00774 | 0.025842 | 0.008923 | 1.6672  | 1.1528 |
| MMP-7             | 0.014   | 0.00711 | 0.033389 | 0.007377 | 2.3849  | 1.0368 |
| MMP-8             | 0.0123  | 0.00565 | 0.023299 | 0.00546  | 1.8942  | 0.9664 |
| MMP-10            | 0.0268  | 0.01265 | 0.050864 | 0.013258 | 1.8978  | 1.0480 |
| NCAM-1            | 0.046   | 0.01735 | 0.0781   | 0.024178 | 1.6978  | 1.3935 |
| Nidogen-1         | 0.1495  | 0.0815  | 0.379012 | 0.10878  | 2.5351  | 1.3347 |
| NrCAM             | 0.0305  | 0.01535 | 0.038065 | 0.013555 | 1.2480  | 0.8830 |
| NRG1- $\beta$ 1   | 0.02385 | 0.01525 | 0.02699  | 0.013725 | 1.1316  | 0.9    |
| Osteopontin       | 0.01625 | 0.00947 | 0.007679 | 0.007173 | 0.4725  | 0.7570 |
| PAI-I             | 0.232   | 0.1485  | 0.255136 | 0.161895 | 1.0997  | 1.0901 |
| Platelet Factor 4 | 0.01785 | 0.00811 | 0.02658  | 0.007678 | 1.4890  | 0.9461 |
| PSA-total         | 0.01245 | 0.00645 | 0.017966 | 0.004547 | 1.4430  | 0.7049 |
| RAGE              | 0.01115 | 0.00530 | 0.014972 | 0.004781 | 1.3427  | 0.9011 |
| RANK              | 0.00649 | 0.00270 | 0.009664 | 0.003837 | 1.4879  | 1.4184 |
| Resistin          | 0.00062 | 0       | 0        | 0.000134 | 0       | 1.5845 |
| SAA               | 0.01875 | 0.00856 | 0.029288 | 0.007292 | 1.562   | 0.8513 |
| Siglec-9          | 0.019   | 0.00936 | 0.037491 | 0.006777 | 1.9732  | 0.7237 |
| TACE              | 0.0241  | 0.01185 | 0.035194 | 0.011218 | 1.4603  | 0.9466 |
| TIM-1             | 0.01155 | 0.00595 | 0.014767 | 0.006646 | 1.2785  | 1.1160 |
| TRAIL R2          | 0.0182  | 0.00985 | 0.023135 | 0.010071 | 1.2711  | 1.0223 |
| Trappin-2         | 0.0106  | 0.00915 | 0.00617  | 0.006697 | 0.5820  | 0.7314 |
| TREM-1            | 0.0145  | 0.00906 | 0.02174  | 0.008108 | 1.49931 | 0.8948 |
| TSH               | 0.02905 | 0.01455 | 0.041921 | 0.017167 | 1.44306 | 1.1798 |
| TSLP              | 0.0123  | 0.00695 | 0.012199 | 0.006913 | 0.9917  | 0.9940 |
| VCAM-1            | 0.01255 | 0.00717 | 0.011239 | 0.006183 | 0.89553 | 0.8622 |
| VEGF-C            | 0.01465 | 0.00931 | 0.012167 | 0.007513 | 0.8304  | 0.8069 |
| XEADR             | 0.02665 | 0.01415 | 0.023299 | 0.01092  | 0.8742  | 0.7717 |

Table S2. Cytokine array on MRC5 supernatant.

|               | CTRL    |         | SW620    |          | Fold change |        |
|---------------|---------|---------|----------|----------|-------------|--------|
|               | R1      | R2      | R1       | R2       | R1          | R2     |
| ENA-78        | 0.101   | 0.0182  | 0.110055 | 0.029407 | 1.0896      | 1.6158 |
| GCSF          | 0.0107  | 0.00169 | 0.007956 | 0.006023 | 0.7435      | 3.5639 |
| GM-CSF        | 0.0065  | 0       | 0.005828 | 0        | 0.8857      | 0      |
| GRO           | 0.109   | 0.0114  | 0.088177 | 0.013741 | 0.8100      | 1.2053 |
| GRO- $\alpha$ | 0.0573  | 0.0143  | 0.050785 | 0.010222 | 0.8863      | 0.7148 |
| I-309         | 0.0318  | 0.00645 | 0.022674 | 0.006254 | 0.7130      | 0.9696 |
| IL-1 $\alpha$ | 0.0383  | 0.00203 | 0.030166 | 0.00967  | 0.7876      | 4.7635 |
| IL-1 $\beta$  | 0.0727  | 0.00755 | 0.0661   | 0.022216 | 0.9092      | 2.9425 |
| IL-2          | 0.0161  | 0.00127 | 0.012928 | 0.009066 | 0.8029      | 7.1385 |
| IL-3          | 0.0677  | 0.00488 | 0.088177 | 0.031462 | 1.3024      | 6.4471 |
| IL-4          | 0.0266  | 0.00301 | 0.025923 | 0.007949 | 0.9745      | 2.6408 |
| IL-5          | 0.0229  | 0       | 0.019558 | 0.003942 | 0.8540      | 0      |
| IL-6          | 0.957   | 0.0198  | 1.200002 | 0.030435 | 1.2539      | 1.5371 |
| IL-7          | 0.00391 | 0       | 0.002446 | 0.001913 | 0           | 0      |

|                |        |         |          |          |        |         |
|----------------|--------|---------|----------|----------|--------|---------|
| IL-8           | 0.568  | 0.0925  | 0.5642   | 0.25298  | 0.9933 | 2.7349  |
| IL-10          | 0.0571 | 0.00944 | 0.0541   | 0.004867 | 0.9474 | 0.5155  |
| IL-12          | 0.0617 | 0.0278  | 0.059403 | 0.014254 | 0.9627 | 0.5127  |
| IL-13          | 0.0478 | 0       | 0.047536 | 0.000119 | 0.9944 | 0       |
| IL-15          | 0.0426 | 0.00787 | 0.050387 | 0.018749 | 1.1827 | 2.3823  |
| IFN- $\gamma$  | 0.0666 | 0.011   | 0.078895 | 0.027738 | 1.1846 | 2.5216  |
| MCP-1          | 1.22   | 0.213   | 1.538124 | 0.602272 | 1.2607 | 2.8275  |
| MCP-2          | 0.0258 | 0.00504 | 0.030961 | 0.011069 | 1.2000 | 2.1962  |
| MCP-3          | 0.0324 | 0.00613 | 0.041304 | 0.006883 | 1.2748 | 1.1228  |
| MCSF           | 0.0955 | 0.0164  | 0.104752 | 0.03159  | 1.0968 | 1.9262  |
| MDC            | 0.0583 | 0.00999 | 0.069613 | 0.020161 | 1.1940 | 2.0181  |
| MIG            | 0.0811 | 0.00461 | 0.052243 | 0.023115 | 0.6441 | 5.0140  |
| MIP-1b         | 0.141  | 0.0353  | 0.131934 | 0.015282 | 0.9357 | 0.4329  |
| MIP-1 $\delta$ | 0.046  | 0.00665 | 0.033083 | 0.010196 | 0.7191 | 1.5332  |
| RANTES         | 0.104  | 0.0115  | 0.096133 | 0.023243 | 0.9243 | 2.0211  |
| SCF            | 0.0534 | 0.00811 | 0.043624 | 0.018492 | 0.8169 | 2.2801  |
| SDF-1          | 0.0574 | 0.0115  | 0.045216 | 0.068317 | 0.7877 | 5.9406  |
| TARC           | 0.0491 | 0.00593 | 0.067624 | 0.015667 | 1.3772 | 2.6419  |
| TGF- $\beta$ 1 | 0.0115 | 0.00074 | 0.017768 | 0.013741 | 1.5450 | 18.4690 |
| TNF- $\alpha$  | 0.0585 | 0.00862 | 0.053635 | 0.017978 | 0.9168 | 2.0856  |
| TNF- $\beta$   | 0.0401 | 0.00673 | 0.033348 | 0.014254 | 0.8316 | 2.1179  |
| EGF            | 0.0888 | 0.015   | 0.092155 | 0.029407 | 1.0377 | 1.9604  |
| IGF-1          | 0.218  | 0.0278  | 0.129945 | 0.060356 | 0.5960 | 2.1710  |
| Angiogenin     | 0.438  | 0.0596  | 0.424973 | 0.053036 | 0.9702 | 0.8898  |
| Oncostatin M   | 0.143  | 0.0216  | 0.116685 | 0.037112 | 0.8159 | 1.7181  |
| Thrombopoietin | 0.0578 | 0.0087  | 0.034608 | 0.014254 | 0.5987 | 1.6383  |
| VEGF           | 0.0827 | 0.0128  | 0.066961 | 0.024784 | 0.8096 | 1.9362  |
| PDGF-BB        | 0.0451 | 0.00753 | 0.040972 | 0.014254 | 0.9084 | 1.8929  |
| Leptin         | 0.0824 | 0.0074  | 0.076243 | 0.017721 | 0.9252 | 2.3947  |
| BDNF           | 0.507  | 0.0526  | 0.716023 | 0.086553 | 1.4122 | 1.6454  |
| BLC            | 0.0456 | 0.0078  | 0.03368  | 0.018364 | 0.7385 | 2.3543  |
| Ck $\beta$ 8-1 | 0.0822 | 0.0129  | 0.074254 | 0.024528 | 0.9033 | 1.9013  |
| Eotaxin        | 0.0552 | 0.0185  | 0.065039 | 0.022344 | 1.1782 | 1.2077  |
| Eotaxin-2      | 0.0641 | 0.0341  | 0.048066 | 0.017336 | 0.7498 | 0.5083  |
| Eotaxin-3      | 0.0385 | 0.0117  | 0.033348 | 0.010338 | 0.8661 | 0.8835  |
| FGF-4          | 0.0543 | 0.0115  | 0.042961 | 0.018235 | 0.7911 | 1.5856  |
| FGF-6          | 0.0849 | 0.0179  | 0.057547 | 0.023243 | 0.6778 | 1.2984  |
| FGF-7          | 0.0631 | 0.00335 | 0.043492 | 0.009451 | 0.6892 | 2.8211  |
| FGF-9          | 0.102  | 0.0208  | 0.086851 | 0.037112 | 0.8514 | 1.7842  |
| Flt-3 Ligand   | 0.0585 | 0.0106  | 0.044221 | 0.011776 | 0.7559 | 1.1109  |
| Fractalkine    | 0.0476 | 0.0105  | 0.046541 | 0.022601 | 0.9777 | 2.1524  |

|                 |        |         |          |          |        |        |
|-----------------|--------|---------|----------|----------|--------|--------|
| GCP-2           | 0.0573 | 0.0127  | 0.050718 | 0.019391 | 0.8851 | 1.5268 |
| GDNF            | 0.0928 | 0.0149  | 0.093481 | 0.025812 | 1.0073 | 1.7323 |
| HGF             | 1.95   | 0.401   | 1.809947 | 0.395522 | 0.9281 | 0.9863 |
| IGFBP-1         | 0.0752 | 0.0105  | 0.055823 | 0.015153 | 0.7423 | 1.4431 |
| IGFBP-2         | 0.131  | 0.0261  | 0.082873 | 0.029022 | 0.6326 | 1.1119 |
| IGFBP-3         | 0.0745 | 0.0109  | 0.066961 | 0.012649 | 0.8988 | 1.1604 |
| IGFBP-4         | 0.0843 | 0.0109  | 0.071602 | 0.009015 | 0.8493 | 0.8270 |
| IL-16           | 0.0964 | 0.0155  | 0.071602 | 0.01618  | 0.7427 | 1.0438 |
| IP-10           | 0.118  | 0.0244  | 0.099448 | 0.01862  | 0.8427 | 0.7631 |
| LIF             | 0.143  | 0.02    | 0.099448 | 0.017336 | 0.6954 | 0.8668 |
| LIGHT           | 0.0773 | 0.0216  | 0.065702 | 0.020547 | 0.8499 | 0.9512 |
| MCP-4           | 0.0404 | 0.00806 | 0.036995 | 0.007641 | 0.9157 | 0.9480 |
| MIF             | 0.0714 | 0.0139  | 0.055293 | 0.013355 | 0.7744 | 0.9607 |
| MIP-3 $\alpha$  | 0.0612 | 0.0119  | 0.019558 | 0.010736 | 0.3195 | 0.9021 |
| NAP-2           | 0.192  | 0.014   | 0.081547 | 0.011994 | 0.4247 | 0.8567 |
| NT-3            | 0.156  | 0.0135  | 0.07558  | 0.013741 | 0.4844 | 1.0178 |
| NT-4            | 0.0849 | 0.00972 | 0.066298 | 0.008578 | 0.7808 | 0.8825 |
| Osteopontin     | 0.132  | 0.0168  | 0.08884  | 0.007243 | 0.6730 | 0.4311 |
| Osteoprotegerin | 2.74   | 0.593   | 2.333705 | 0.410932 | 0.8517 | 0.6929 |
| PARC            | 0.0929 | 0.0112  | 0.06358  | 0.005252 | 0.6843 | 0.4689 |
| PIGF            | 0.075  | 0.00888 | 0.051514 | 0.006151 | 0.6868 | 0.6926 |
| TGF- $\beta$ 2  | 0.0448 | 0.00112 | 0.028044 | 0.001926 | 0.6259 | 1.7196 |
| TGF- $\beta$ 3  | 0.0856 | 0.0108  | 0.056884 | 0.006036 | 0.6645 | 0.5588 |
| TIMP-1          | 1.69   | 0.559   | 1.206631 | 0.308199 | 0.7139 | 0.5513 |
| TIMP-2          | 2.5    | 0.00737 | 1.770168 | 0.007975 | 0.7080 | 1.0820 |
